# Supplementary material
Source: Springer Nature journal article supplement (https://www.springermedizin.de/resource/supplementary/12936_2006_335_MOESM3_ESM.pdf/9547578)

1 2 3 4 5 6 7 8 9 10 11 12 13 14 15 16 17 18 19 20 21 22 23

600bp  
400bp  
300bp  
200bp  
100bp

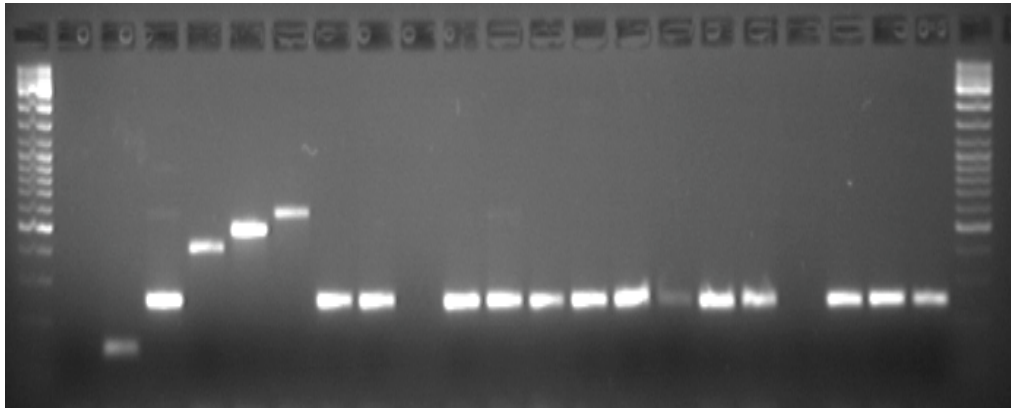

Supplement: MOESM3 [file 9547578]
